# Supplementary material for: Corticospinal excitability remains unchanged in the presence of residual force enhancement and does not contribute to increased torque production
Source: PeerJ. 2022 Jan 6;10:e12729. doi: 10.7717/peerj.12729 (PMC8743010; doi:10.7717/peerj.12729)
Supplement: Supplemental Information 3 [file peerj-10-12729-s003.xlsx]

## Sheet: muscle activity EMG
	Background EMG for contractions with subthreshold TMS
	SOL (STR)	SOL (REF)	MG (STR)	MG (REF)	LG (STR)	LG (REF)
subject
1	0.08531	0.08605	0.13725	0.14668	0.08262	0.08465
2	0.05137	0.05214	0.18136	0.19401	0.09289	0.09312
3	0.07885	0.08072	0.07709	0.07699	0.07444	0.07192
5	0.0761	0.07734	0.02776	0.02985	0.05652	0.05661
6	0.13052	0.12842	0.36923	0.4126	0.13246	0.13822
7	0.10231	0.10244	0.11828	0.12634	0.09155	0.08928
9	0.13153	0.13203	0.27064	0.30236	0.13807	0.13933
12	0.08469	0.0844	0.11043	0.1198	0.15205	0.15348
14	0.08117	0.08099	0.13616	0.13626	0.13657	0.14094
Background EMG for contractions with suprathreshold TMS
	SOL (STR)	SOL (REF)	MG (STR)	MG (REF)	LG (STR)	LG (REF)
subject
1	0.11951	0.119489	0.132857	0.150355	0.0927137	0.109988
3	0.112336	0.115753	0.0795366	0.0353416	0.0949752	0.0842242
5	0.0972865	0.0934434	0.0409173	0.0365448	0.0812142	0.075812
6	0.145675	0.139769	0.768092	0.774185	0.151493	0.156811
7	0.0993046	0.0929771	0.102082	0.111027	0.0950215	0.0895996
8	0.0709692	0.0702564	0.0291702	0.0283401	0.051966	0.0511255
9	0.19861	0.196322	0.454728	0.477446	0.178882	0.169733
10	0.11851	0.104961	0.334464	0.32446	0.117653	0.11322
11	0.132338	0.14657	0.107056	0.151649	0.0709371	0.109429
12	0.0988955	0.0988963	0.141995	0.154478	0.161067	0.188902

## Sheet: rFE
	Torque (Nm) during contractions with subthreshold TMS
	STR	REF
subject
1	120.425	114.226
2	73.036	69.485
3	67.646	59.9
5	88.861	84.56
6	132.861	115.004
7	67.917	63.014
9	103.965	99.412
12	132.374	124.142
14	165.954	161.5
	Torque (Nm) during contractions with suprathreshold TMS
	STR	REF
subject
1	101.909	99.506
3	65.822	50.195
5	89.31	83.533
6	123.216	111.202
7	55.933	53.513
8	92.589	77.354
9	104.173	98.419
10	96.575	93.259
11	45.613	37.419
12	119.327	117.804

## Sheet: EMG supression SOL, MG & LG
	EMG suppression following subtrheshold TMS							Latency (ms) of EMG supression							Duration (ms) of EMG supression
muscle	SOL (STR)	SOL (REF)	MG (STR)	MG (REF)	LG (STR)	LG (REF)		SOL (STR)	SOL (REF)	MG (STR)	MG (REF)	LG (STR)	LG (REF)		SOL (STR)	SOL (REF)	MG (STR)	MG (REF)	LG (STR)	LG (REF)
subject
1	0.0137	0.01532	0.0194358	0.0165416	0.0129962	0.00960124		46.2	46.4	50.5969	47.619	50.334	49.455		12.5	14.4	7.46163	12.6037	5.57233	6.30519
2	0.0071	0.01119	0.042569	0.0437598	0.0158401	0.0121586		43.5	46.1	49.3025	48.9521	50.696	48.7627		18.9	15.7	12.9758	11.8019	9.51723	10.524
3	0.00923	0.0096	0.00819791					43	42.5	44.3151					11.1	9.3	9.78812
5	0.01364	0.01581			0.0096416	0.00811783		45.7	46.2			39.1564	40.0716		22	19.6			17.7875	16.4345
6	0.02294	0.01361	0.0708264	0.0601684	0.00966827	0.0197716		51	51	47.0711	40.1608	49.5723	36.834		11	11	11.2998	16.5391	8.75274	21.5676
7	0.02599	0.0243	0.02018	0.0255999	0.0163934	0.0156023		44	43.8	32.8279	34.7495	47.7838	47.7451		11.8	11.6	20.2869	19.9599	10.351	9.93707
9	0.0257	0.0303	0.0572629	0.0422899	0.0340146	0.0210844		41.2	40.3	38.0651	39.3103	40.2068	40.984		6.2	11.2	12.5678	9.04509	9.03988	7.86725
12	0.01437	0.01134	0.0172768	0.0307456	0.0195516	0.0290084		41.4	37.5	43.9936	40.2778	44.6735	43.9646		18.3	19.8	11.1502	16.4938	10.2749	10.7028
14	0.0148547	0.0166222		0.0338825	0.0235266	0.0206669		45.37	44.53	40.5464	38.11	42.64	42.96		6.35693	9.73111	11.1146	15.2011	6.62627	8.7753

## Sheet: MEPs and SP
subject	MEP amplitude (V)							Silent Period duration (ms)
	SOL (STR)	SOL (REF)	MG (STR)	MG (REF)	LG (STR)	LG (REF)		SOL (STR)	SOL (REF)	MG (STR)	MG (REF)	LG (STR)	LG (REF)
1	1.479	1.491	1.17	1.269	0.953	1.192		191.8	190.37	162.99	154.3	188.74	178.23
3	0.95	0.7	0.841	0.397	1.344	1.453		119.9	113.14	108.64		113.75	110.36
5	1.436	1.312	0.517	0.407	1.086	1.016		138.37	139.29			157.72	158.41
6	1.482	1.1	9.264	7.951	1.219	1.135		99.59	93.14	105.03	98.45	97.71	92.99
7	0.513	0.442	0.675	0.701	0.513	0.615		99.23	93.64	84.84	83.02	95.6	98.94
8	0.565	0.53			0.327	0.326		87.23	85.9			83.85	83.86
9	3.097	3.083	5.73	5.953	1.956	1.671		121.5	124.25	112.76	113.65	110.01	113.54
10	1.271	1.173	3.157	2.9	1.37	1.272		102.26	98.38	124.79	108.59	130.56	116.62
11	1.652	2.026	1.133	1.482	0.868	1.436		95.53	103.57	100.32	112.85	98.36	109.96
12	1.205	1.121	1.74	1.802	1.717	1.81		104.91	103.38	120.47	111.84	154.13	113.12

## Sheet: superimposed twitch torque
	Superimposed twitch amplitude (Nm)
	STR	REF
subject
1	9.094	7.332
3	4.898	3.653
5	12.355	10.951
6	8.3686	7.5378
7	4.952	4.228
8	7.17	6.735
9	14.989	14.865
10	11.957	10.31
11	5.292	8.109
12	11.632	11.882
